# Supplementary material for: Steric effects of nucleophile-radical coupling reaction. Determination of rate constants for the reaction of aryl radicals with 2-naphthoxide anion
Source: Royal Society of Chemistry journal article supplement (doi:10.1039/b820374a), 2009-01-01
Supplement: b820374a.pdf [file b820374a.pdf]

## Steric effects of nucleophile-radical coupling reaction. Determination of rate constants for the reaction of aryl radicals with 2-naphthoxide anion

Tomas C. Tempesti, Adriana B. Pierini, Maria T. Baumgartner<sup>\*a</sup>

INFIQC, Departamento de Química Orgánica, Facultad de Ciencias Químicas. Universidad Nacional de Córdoba. Ciudad Universitaria. 5000 Córdoba, Argentina Fax: 54-351-4333030/4334170; Tel: 54-351-4334170/73; E-mail: tere@fcq.unc.edu.ar

### Electronic Supplementary Information (ESI)

|                                                                                                                       |      |
|-----------------------------------------------------------------------------------------------------------------------|------|
| <sup>1</sup> H NMR and <sup>13</sup> C NMR spectra of compounds <b>3e</b>                                             | 2    |
| Computational procedure                                                                                               | 3    |
| <i>Figure ESI 1</i> : The hybridization change (sp <sup>2</sup> to sp <sup>3</sup> ) in reaction path.                | 4    |
| The energy of PES relevant points of the reaction of the anion of <b>1</b> with different aryl radicals and solvents. | 5 –7 |

$^1\text{H}$  NMR and  $^{13}\text{C}$  NMR spectra of compounds **3e**.

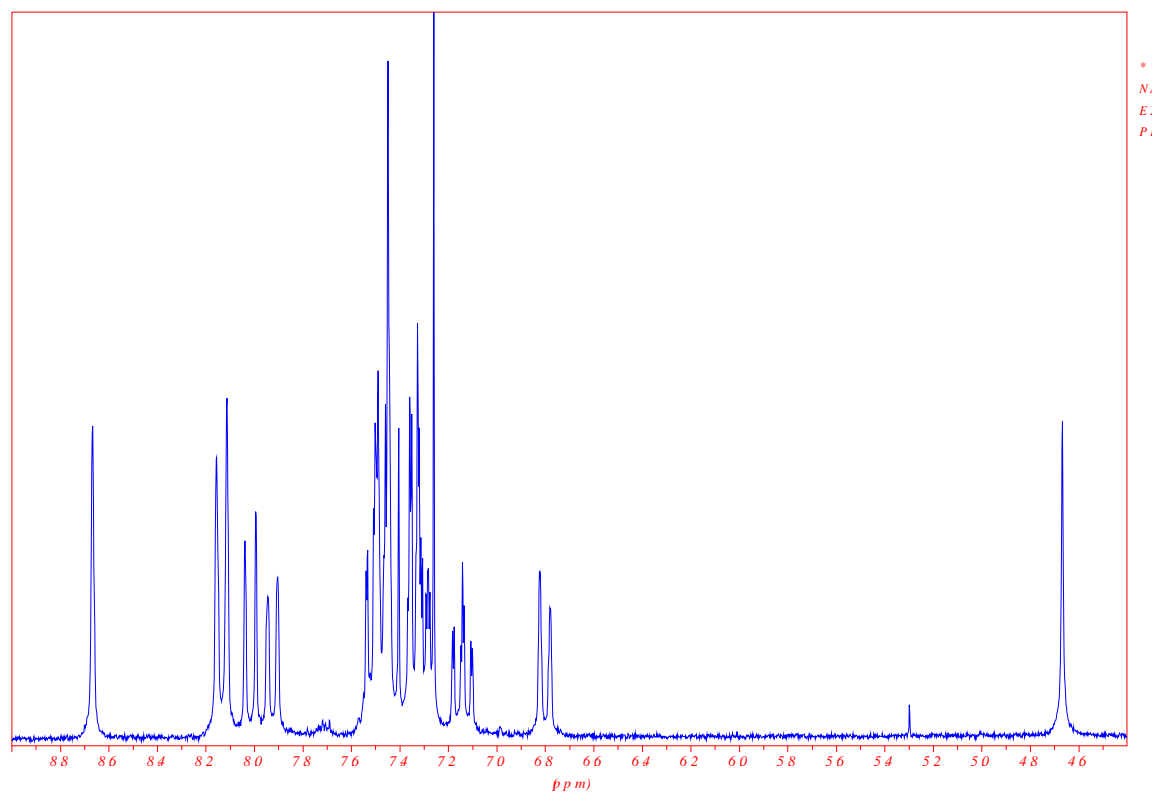

0.15

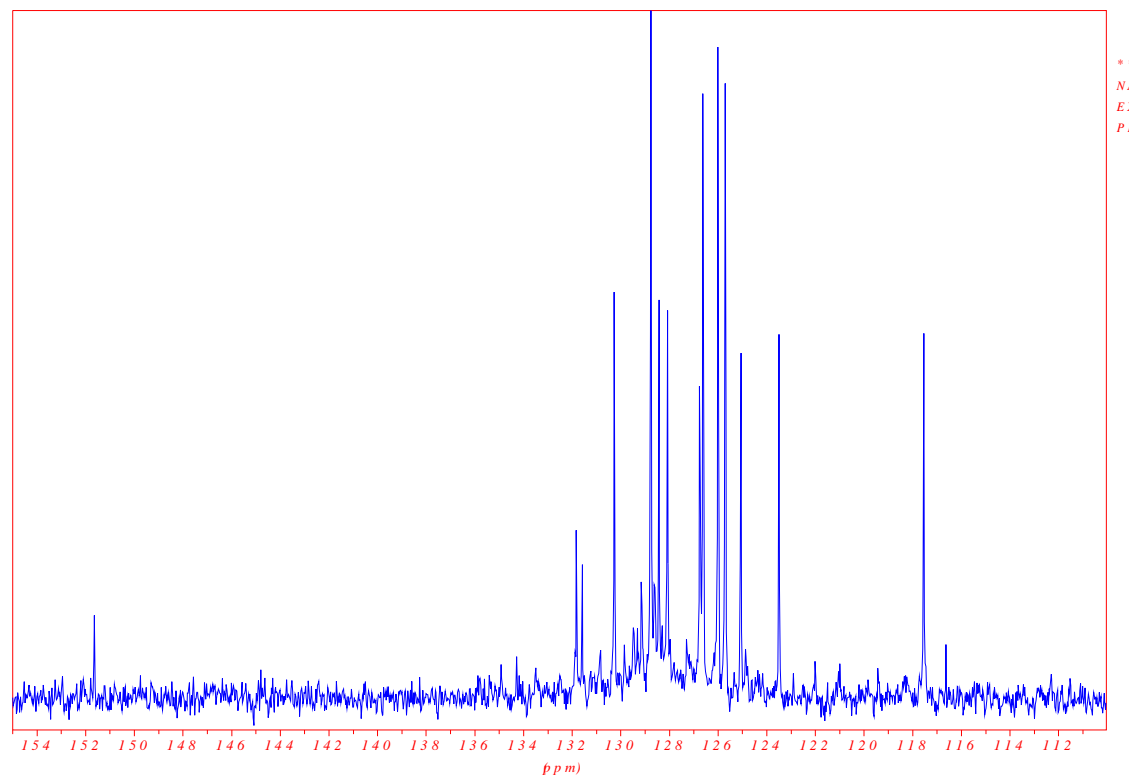

### *Computational procedure*

All calculations were carried out with the semiempirical AM1 and B3LYP methods as implemented in Gaussian 03 within the UHF(opened shell systems) or RHF(closed shell systems) formalisms in order to properly account for the electronic nature of the species under study. First, the most stable conformers of the radical anions  $\text{R}\dot{\text{N}}\text{u}^-$  were evaluated through an AM1 conformational search by scanning the two or three main torsion angles. The conformers thus obtained were then refined with complete geometry optimization. The geometries thus found were used as starting points to study the PEs corresponding to the C-C bond breaking/formation. The equilibrium geometries were obtained with complete geometry optimization. The intermediates and transition states were first located through the reaction coordinate method and then refined with the appropriate procedure. The stationary points were located by Hessian matrix calculations: all positive eigenvalues for a minimum energy species and one imaginary frequency for transition states. PEs explorations within the B3LYP DFT functional and the 6-31G\* basis set were carried out by the same procedure. The solvent effect was modeled with a continuum model as implemented in the G03 program. The solvent stabilization was evaluated from single point calculations on the gas-phase optimized geometries at the B3LYP/6-31G\* theory level; electrostatic and non-electrostatic contributions being considered.

*Figure ESI 1:* The hybridization change ( $sp^2$  to  $sp^3$ ) in reaction path, for the coupling of 2-naphthoxide anion and 2-methoxy-1-naphthyl radical.

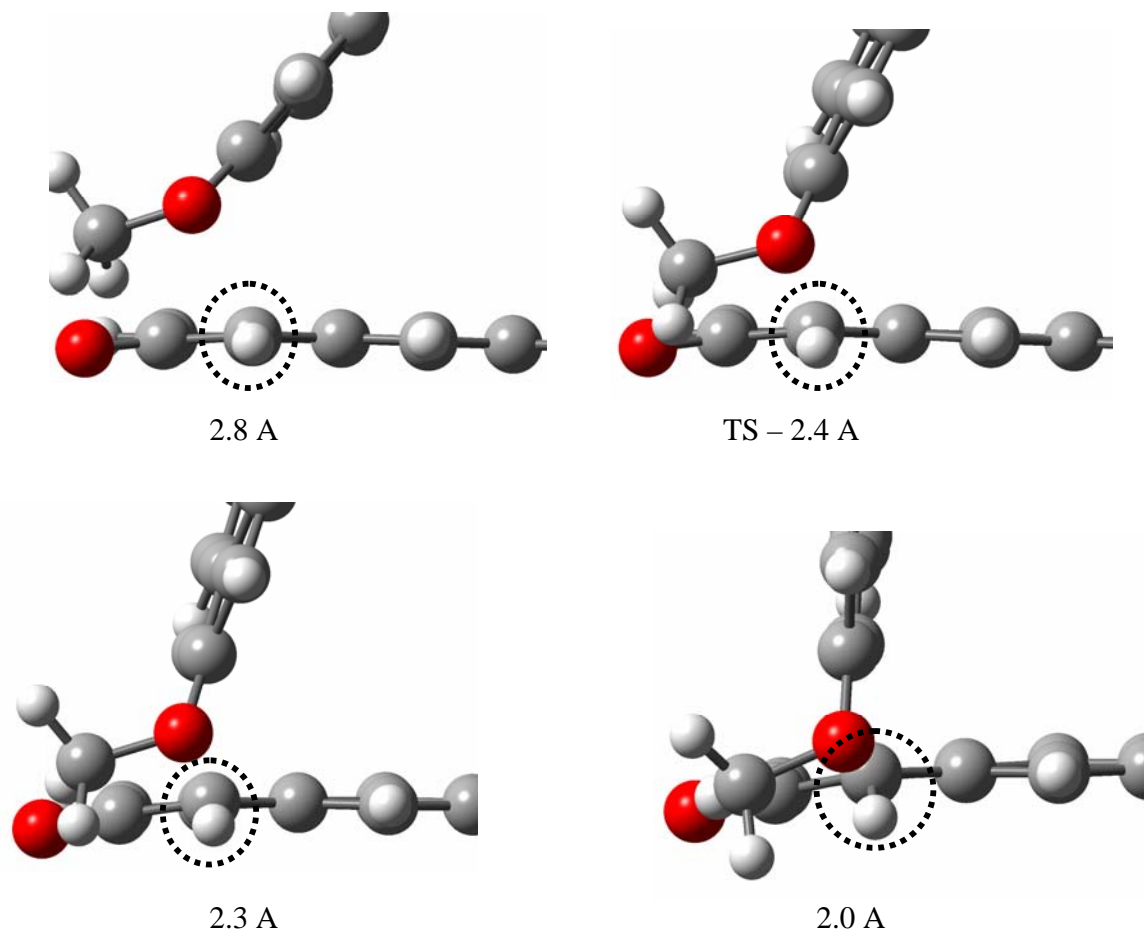

*Table ESI 1. The energy of PES relevant points of the reaction of the anion of 1 with different aryl radicals.*

Anion of 2-naphthol + 4-anisyl radical (2a)

|                      |           | Distance<br>C1-radical<br>centre | Energy<br>(Hartree) | Solvation<br>Energy<br>(kcal/mol) | $\Delta E^a$<br>(kcal/mol) | $\Delta E_{TS-IT}$<br>(kcal/mol) |
|----------------------|-----------|----------------------------------|---------------------|-----------------------------------|----------------------------|----------------------------------|
| Product              | Gas phase | 1.53856                          | -806,6865077        |                                   | -36,5555032                |                                  |
|                      | solution  |                                  | -806,7684817        | -51,4394638                       | -33,0338571                |                                  |
| TS                   | Gas phase | 3.00375                          | -806,6354174        |                                   | -4,49585456                | 1,6018868                        |
|                      | solution  |                                  | -806,7178855        | -51,7495162                       | -1,28426094                | 0,46931436                       |
| IT                   | Gas phase | 5.34683                          | -806,6380193        |                                   | -6,09774136                |                                  |
|                      | solution  |                                  | -806,7186334        | -50,6169438                       | -1,7535753                 |                                  |
| Reactive<br>s (15 Å) | Gas phase |                                  | -806,6282528        |                                   |                            |                                  |
|                      | solution  |                                  | -806,7158389        | -54,9611098                       |                            |                                  |

<sup>a</sup> $\Delta E$  = energy difference between transition states and reactants (anion of 1 + radical, distance = 15 Å).

Anion of 2-naphthol + 2-anisyl radical (2b)

|                      |           | Distance<br>C1-radical<br>centre | Energy (Hartree) | Solvation<br>Energy<br>(kcal/mol) | $\Delta E^a$<br>(kcal/mol) | $\Delta E_{TS-IT}$<br>(kcal/mol) |
|----------------------|-----------|----------------------------------|------------------|-----------------------------------|----------------------------|----------------------------------|
| Product              | Gas phase | 1.53108                          | -806,6877749     |                                   | -32,9834681                |                                  |
|                      | solution  |                                  | -806,7658848     | -49,0147043                       | -30,5499235                |                                  |
| TS                   | Gas phase | 2.46068                          | -806,6382664     |                                   | -1,91641401                | 0,12838844                       |
|                      | solution  |                                  | -806,7147711     | -48,007426                        | 1,52440883                 | 1,99623322                       |
| IT                   | Gas phase | 5.68453                          | -806,638471      |                                   | -2,04480246                |                                  |
|                      | solution  |                                  | -806,7179523     | -49,8752708                       | -0,47182439                |                                  |
| Reactive<br>s (15 Å) | Gas phase |                                  | -806,6352124     |                                   |                            |                                  |
|                      | solution  |                                  | -806,7172004     | -51,4482489                       |                            |                                  |

<sup>a</sup> $\Delta E$  = energy difference between transition states and reactants (anion of 1 + radical, distance = 15 Å).

Anion of 2-naphthol + 1-naphthyl radical (2c)

|                      | Distance<br>C1-radical<br>centre | Energy (Hartree) | Solvatation<br>Energy<br>(kcal/mol) | $\Delta E^a$<br>(kcal/mol) | $\Delta E_{TS-IT}$<br>(kcal/mol) |
|----------------------|----------------------------------|------------------|-------------------------------------|----------------------------|----------------------------------|
| Product              | 1.53011                          | -845,8088519     |                                     | -34,9701632                |                                  |
|                      | solution                         | -845,887836      | -49,5632731                         | -30,5207443                |                                  |
| TS                   | 2.50742                          | -845,7624239     |                                     | -5,8361521                 | 0,02453562                       |
|                      | solution                         | -845,8408655     | -49,2228492                         | -1,04630934                | 0,35178183                       |
| IT                   | 2.66203                          | -845,762463      |                                     | -5,86068773                |                                  |
|                      | solution                         | -845,8414261     | -49,5500954                         | -1,39809117                |                                  |
| Reactive<br>s (15 Å) |                                  | -845,7531234     |                                     |                            |                                  |
|                      | solution                         | -845,8391981     | -54,01269196                        |                            |                                  |

<sup>a</sup> $\Delta E$  = energy difference between transition states and reactants (anion of **1** + radical, distance = 15 Å).

Anion of 2-naphthol + 2-methoxy-1-naphthyl radical (2d)

|                      | Distance<br>C1-radical<br>centre | Energy (Hartree) | Solvatation<br>Energy<br>(kcal/mol) | $\Delta E^a$<br>(kcal/mol) | $\Delta E_{TS-IT}$<br>(kcal/mol) |
|----------------------|----------------------------------|------------------|-------------------------------------|----------------------------|----------------------------------|
| Product              | 1.53231                          | -960,3288457     |                                     | -29,8186239                |                                  |
|                      | solution                         | -960,4072327     | -49,18858718                        | -28,0464116                |                                  |
| TS                   | 2.4464                           | -960,2834098     |                                     | -1,30716504                | 1,6778349                        |
|                      | solution                         | -960,3589759     | -47,41844563                        | 2,23518884                 | 2,92174698                       |
| IT                   | 3.8922                           | -960,2860836     |                                     | -2,98499994                |                                  |
|                      | solution                         | -960,363632      | -48,66235771                        | -0,68655814                |                                  |
| Reactive<br>s (15 Å) |                                  | -960,2813267     |                                     |                            |                                  |
|                      | solution                         | -960,3625379     | -50,96079951                        |                            |                                  |

<sup>a</sup> $\Delta E$  = energy difference between transition states and reactants (anion of **1** + radical, distance = 15 Å).

*Table 2 ESI. Energy differences between PES relevant points of the reaction of the 2-naphthoxide anion with different aryl radicals calculated for different solvents.*

| Radical   |                                 | Solvation Energy<br>(kcal/mol) |        |           | $\Delta E^a$<br>(kcal/mol) | $\Delta E_{TS-IT}$<br>(kcal/mol) | Products % <sup>b</sup> |      |
|-----------|---------------------------------|--------------------------------|--------|-----------|----------------------------|----------------------------------|-------------------------|------|
|           |                                 | TS                             | IT     | Reactives |                            |                                  | ArH                     | ArNu |
| <b>3a</b> | Gas phase                       |                                |        |           | -4,50                      | 1,60                             |                         |      |
|           | DMSO                            | -51,75                         | -50,62 | -54,96    | -1,28                      | 0,47                             | 7                       | 54   |
|           | CH <sub>3</sub> OH <sup>c</sup> | -51,59                         | -50,49 | -54,77    | -1,32                      | 0,54                             | 13                      | 42   |
| <b>3b</b> | Gas phase                       |                                |        |           | -1,92                      | 0,13                             |                         |      |
|           | DMSO                            | -48,00                         | -49,87 | -51,44    | 1,52                       | 1,99                             | 15                      | 40   |
|           | CH <sub>3</sub> OH <sup>c</sup> | -47,91                         | -49,56 | -50,86    | 1,04                       | 1,78                             | ---                     | ---  |
| <b>3c</b> | Gas phase                       |                                |        |           | -5,84                      | 0,02                             |                         |      |
|           | DMSO                            | -49,22                         | -49,55 | -54,01    | -1,04                      | 0,35                             | 10                      | 65   |
|           | CH <sub>3</sub> OH <sup>c</sup> | -48,91                         | -49,29 | -53,38    | -1,36                      | 0,41                             | 20                      | 53   |
| <b>3d</b> | Gas phase                       |                                |        |           | -1,31                      | 1,68                             |                         |      |
|           | DMSO                            | -47,42                         | -48,66 | -50,96    | 2,24                       | 2,92                             | 46                      | 35   |
|           | CH <sub>3</sub> OH <sup>c</sup> | -47,46                         | -48,49 | -50,35    | 1,59                       | 2,71                             | 56                      | 35   |

<sup>a</sup>  $\Delta E$  = energy difference between transition states and reactants (anion of 1 + radical, distance = 15 Å.

<sup>b</sup> In DMSO, the relation [Nu<sup>-</sup>]/[ArX] = 10. In NH<sub>3</sub> (Methanol calculations), the relation [Nu<sup>-</sup>]/[ArX] = 2.

<sup>c</sup> Protic solvent with dielectric constant more similar to that liquid ammonia.
